# Supplementary material
Source: publisher figshare collection journal article supplement (https://acs.figshare.com/ndownloader/files/10443393)
Supplement: Supplementary file 1 [file 10443393]

## Supporting Information

# Biomimetic Nanovesicles for Enhanced Antitumor Activity of Combinational Photothermal and Chemotherapy

*Tingting Wu<sup>1</sup>, Dan Zhang<sup>1</sup>, Qi Qiao<sup>1</sup>, Xianya Qin<sup>1</sup>, Conglian Yang<sup>1</sup>, Miao Kong<sup>1</sup>,  
Huan Deng<sup>1</sup>, Zhiping Zhang<sup>1,2,3\*</sup>*

<sup>1</sup> Tongji School of Pharmacy

<sup>2</sup> National Engineering Research Center for Nanomedicine

<sup>3</sup> Hubei Engineering Research Center for Novel Drug Delivery System

HuaZhong University of Science and Technology, Wuhan, China 430030

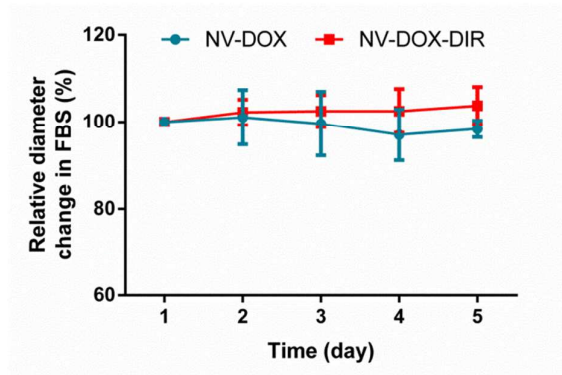

**Figure S1.** The relative diameter change of NV-DOX and NV-DOX-DIR in FBS for 5 days (n = 3).

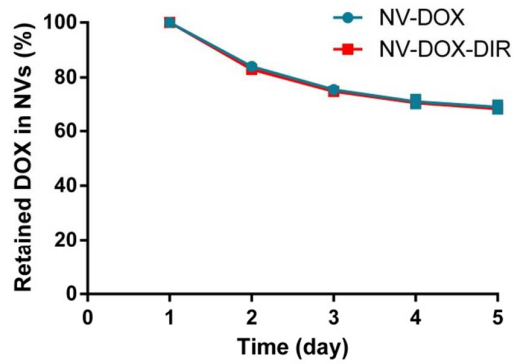

**Figure S2.** The relative retained DOX in NVs for 5 days at 4 °C (n = 3).

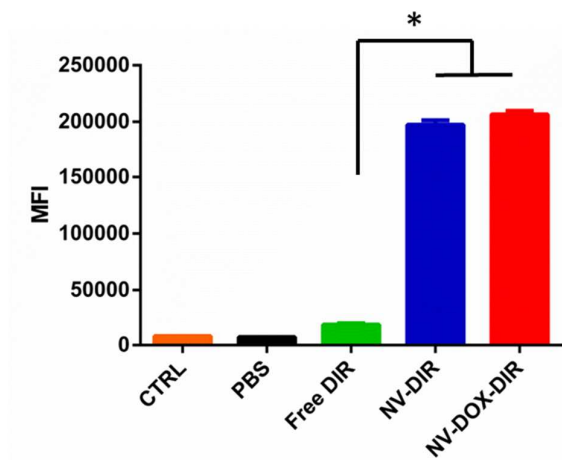

**Figure S3.** Quantitative detection of ROS generation after treating with NIR irradiation (n = 3).

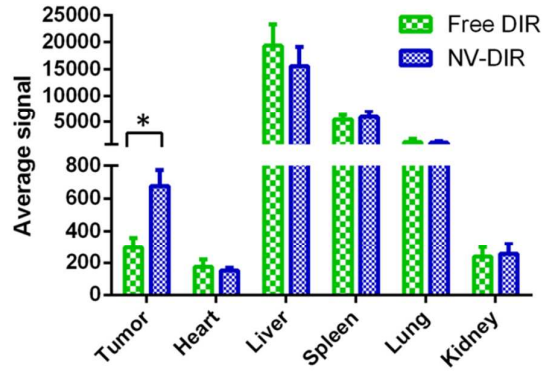

**Figure S4.** The quantitation of fluorescent intensity of tumors and the major organs at 48 h after intravenous injection of free DIR and NV-DIR (n = 3, \* $p < 0.05$ ).

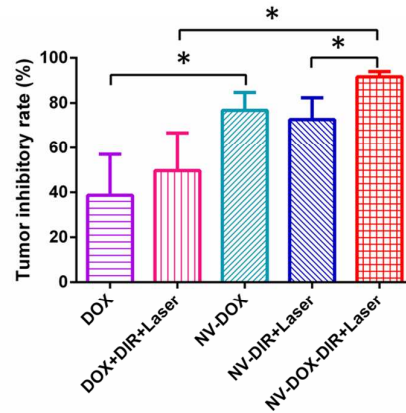

**Figure S5.** The tumor inhibitory rate after treating with PBS+Laser, DOX, DOX+Laser, NV-DOX, NV-DIR+Laser and NV-DOX-DIR+Laser, respectively (n = 7, \* $p < 0.05$ ).

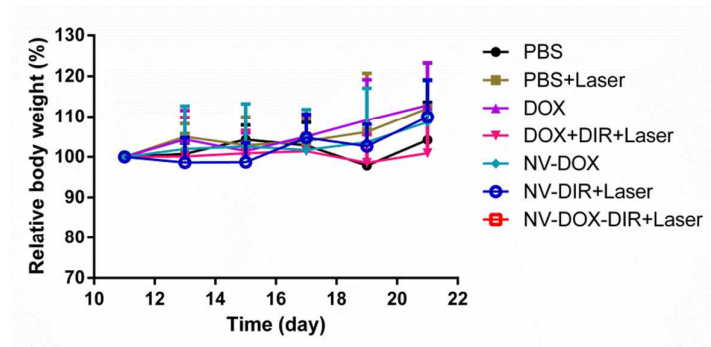

**Figure S6.** The relative body weight change after various treatments (n = 7)

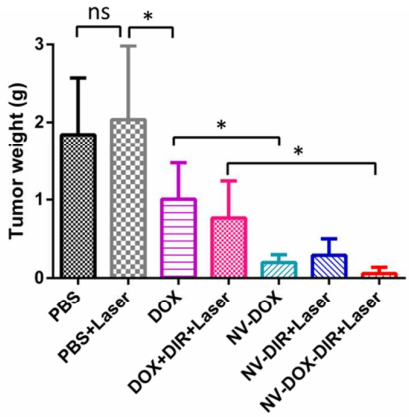

**Figure S7.** The weight of the excised tumors after different treatments ( $n = 7$ ,  $*p < 0.05$ ).
